# Supplementary material for: A role for Kalirin-7 in nociceptive sensitization via activity-dependent modulation of spinal synapses
Source: PubMed Central journal article supplement (PMC4403379; doi:10.1038/ncomms7820), 2015-04-13
Supplement: ncomms7820-s1.pdf [file ncomms7820-s1.pdf]

a

Full blot for Kalirin expression analysis

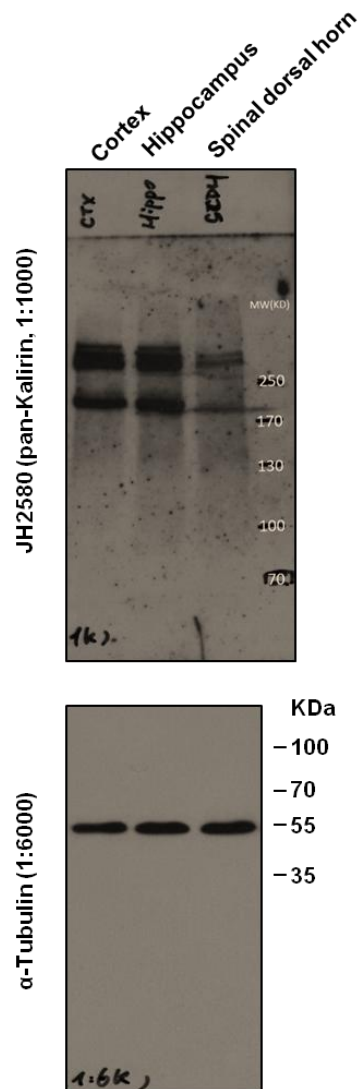

**Supplementary Figure 1.** Full blot for Kalirin expression analysis. Kalirin isoforms were detected with a pan antibody (JH2580), with Tubulin as loading controls.

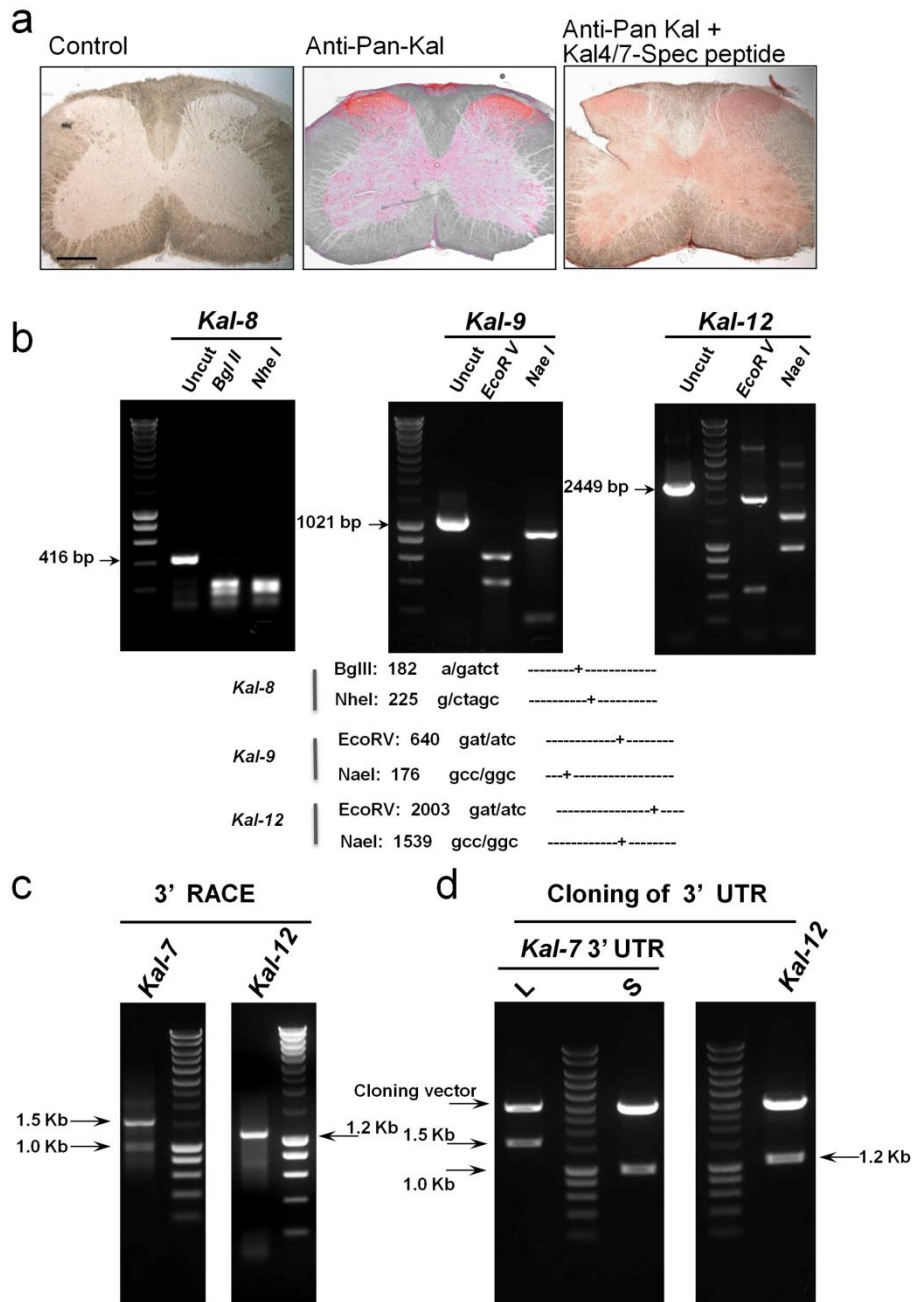

**Supplementary Figure 2.** Expression analysis of spinal dorsal horn Kalirin isoforms derived from the mouse *Kalrn* gene. (A) Immunohistochemistry with a pan-Kalirin antibody revealed immunoreactivity in the neuropil of the superficial spinal dorsal horn (middle), which was blocked by preincubation with the antigen-bearing peptide (far right) (Scale bar = 300  $\mu$ m). (B) RT-PCR analysis of diverse Kalirin transcripts within the spinal cord. Individual amplicons were digested with specific restriction enzymes to verify specificity according to the site maps shown below. (C) 3' RACE was performed to validate the presence of functional full length isoforms of particular interest. Results showed that Kal-7 has two major versions of 3' UTR (1.0 Kb, 1.5 kb respectively). (D) Cloning of each individual 3' UTR (L - longer or S - shorter form in Kal-7).

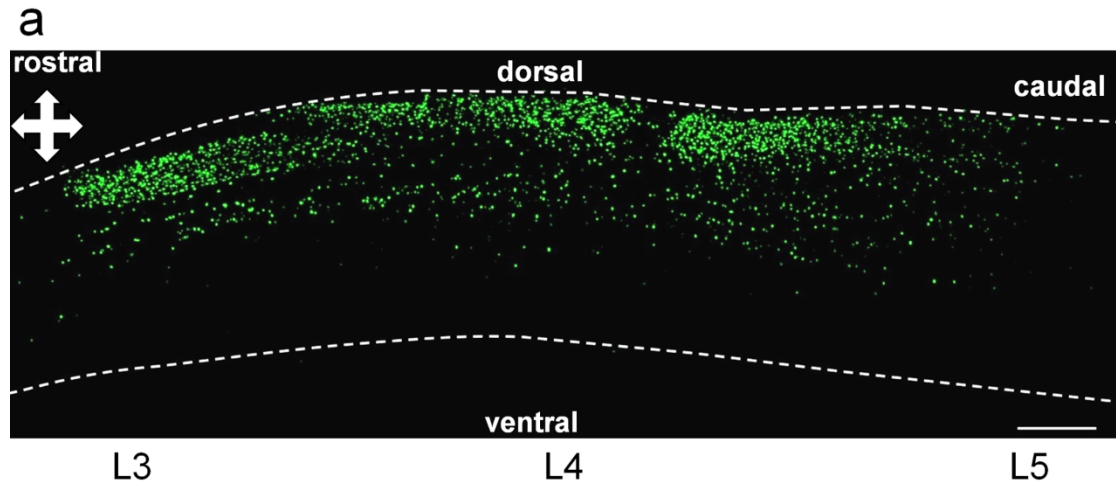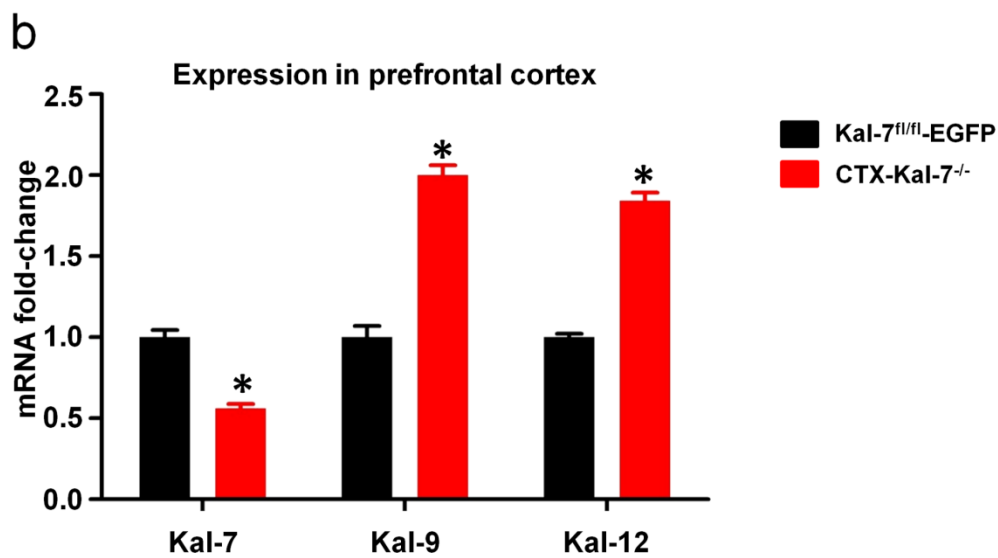

**Supplementary Figure 3.** Strategy for deletion of Kal-7 specifically in the spinal dorsal horn and analysis of other isoforms. (A) Two tandem injections AAV-Cre-2A-GFP into the spinal dorsal horn *in vivo* led to a rostro-caudally 4 mm long transduced area in the superficial lumbar spinal cord stretching over spinal segments L3, L4 & L5 (Scale bar = 300  $\mu$ m). (B) Following AAV-Cre injection into the prefrontal cortex, Cre-mediated Kalirin-7 deletion was validated by quantitative RT-PCR. In contrast, expression of other major isoforms, such as Kal-9 and Kal-12, was increased ( $n = 3$ ;  $* p < 0.01$ , data were collected from 3 independent experiments, two-way ANOVA followed by Bonferroni post-hoc test), as seen in other brain regions in the Kal7<sup>-/-</sup> mouse. Error bars represent standard error of the mean (s.e.m.).

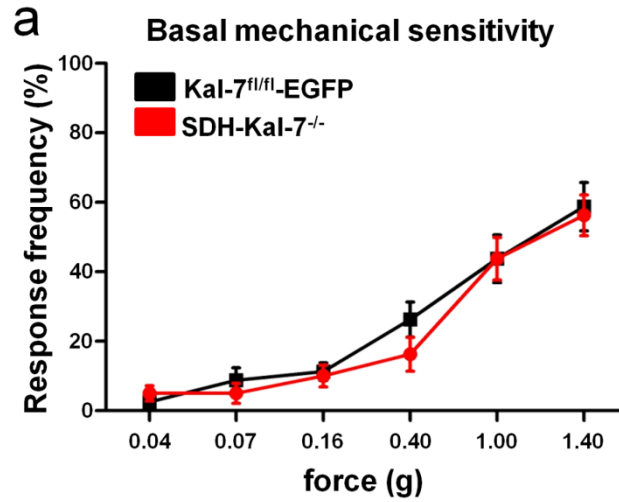

**Supplementary Figure 4.** Behavioral characterization of the effects of spinal deletion of Kal-7 via targeting distinct exons of the *Kalrn* gene. (A) Deletion of Kal-7 in spinal dorsal horn neurons (SDH-Kal7<sup>-/-</sup> mice) did not alter basal sensitivity to mechanical stimuli as compared to the control mice (n = 11-16 per group). Error bars represent standard error of the mean (s.e.m.).

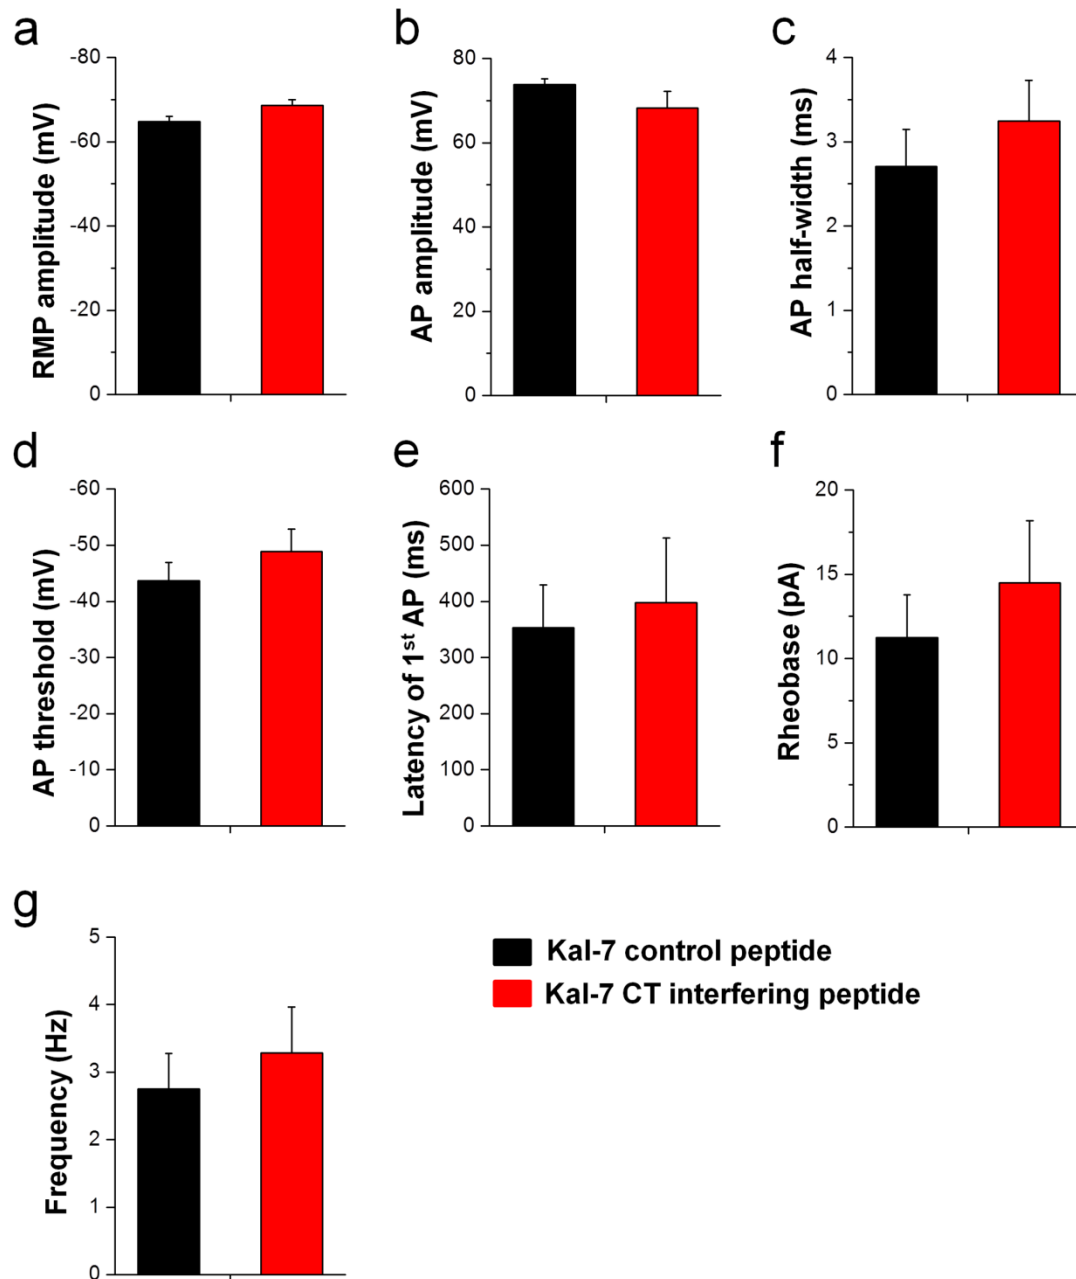

**Supplementary Figure 5.** Disrupting interactions of endogenous Kal-7 with PDZ domain proteins in spinal neurons via intracellular application of a Kal-7 C-terminal (CT) interfering peptide did not exert significant effect on membrane properties and excitability of spino-PAG projection neurons or basal synaptic transmission. Resting membrane potential (RMP), action potential (AP) properties, such as amplitude (A & B), half-width (C), threshold (D), latency of first AP (E), Rheobase (F) and firing frequency (G) to depolarizing step current were not altered by Kal-CT interfering peptide (10  $\mu$ M). Error bars represent standard error of the mean (s.e.m.).

Supplementary Tables:

**Supplementary Table 1** Primers for RT-PCR

| Gene Name           | Oligo Name        | Sequence (5'->3')         |
|---------------------|-------------------|---------------------------|
| Full front Kalirin  | Kal-Top-FL        | CACAGCCACAGCCAAGTACTCCAAG |
|                     | Kal-FLI-3'        | TTGGTGTGCGTGTGGAAAGAGAC   |
| Delta front Kalirin | $\Delta$ Kal-Top  | TGACTTTGCCTCACTTTTGTGCTG  |
|                     | Kal- $\Delta$ -3' | TCTTCGCCTTCCTTGATGACATT   |
| Kalirin7-specific   | KalEx33A_for      | ATGGGGTAGAGGATGGTGACAG    |
|                     | Kal7_UTR_rev2     | AGGTTGGGAGCTGGGGAAGTAC    |
| Kalirin8-specific   | KalEx36A_for      | GACAACGACCCACACAGGATG     |
|                     | Kal8_UTR_rev      | TCGTGAAATTAGGATGTGGGAG    |
| Kalirin9-specific   | KalEx48A_for      | CTCTGCCACCCCTGAAGATAT     |
|                     | Kal9_UTR_rev      | AAATGTAGCAACGGAAGGCATG    |
| Kalirin12-specific  | KalEx59A_for      | GCTGATGGAAGAAAAGGTAGCT    |
|                     | Kal12_UTR_rev     | CTTGGAGTAGCTGCCGTTGTGG    |

**Supplementary Table 2** Primers for Quantitative Real Time-PCR

| Gene Name            | Oligo Name      | Sequence                    | Tm (°C) | Expected size |
|----------------------|-----------------|-----------------------------|---------|---------------|
| GAPDH<br>NM_008084.2 | mrGapdh-top     | TTGTCAGCAATGCATCCTGCACCACC  | 61      | 119 bp        |
|                      | mrGapdh-rev2bot | CTGAGTGGCAGTGATGGCATGGAC    | 61      |               |
| Kalirin7-specific    | KalEx33-for     | GATACCATATCCATTGCCTCCAGGACC | 61      | 127 bp        |
|                      | Kal7unique-rev  | CCAGGCTGCGCGCTAAACGTAAG     | 62      |               |
| Kalirin9-specific    | KalEx51-for     | GCCCCTCGCCAAAGCCACAGC       | 62      | 125 bp        |
|                      | Kal9unique-rev  | CCAGTGAGTCCCGTGGTGGGC       | 62      |               |
| Kalirin12-specific   | KalEx62-for     | CAGCAGCCACGTGCCTGCAGC       | 62      | 140 bp        |
|                      | KalEx62-rev     | TCTTGACATTGGGAATGGGCCGCAC   | 61      |               |
